# Supplementary material
Source: HighWire-hosted journal article supplement (https://drc.bmj.com/content/12/1/e003414)
Supplement: inline-supplementary-material-1 [file inline-supplementary-material-1.pdf]

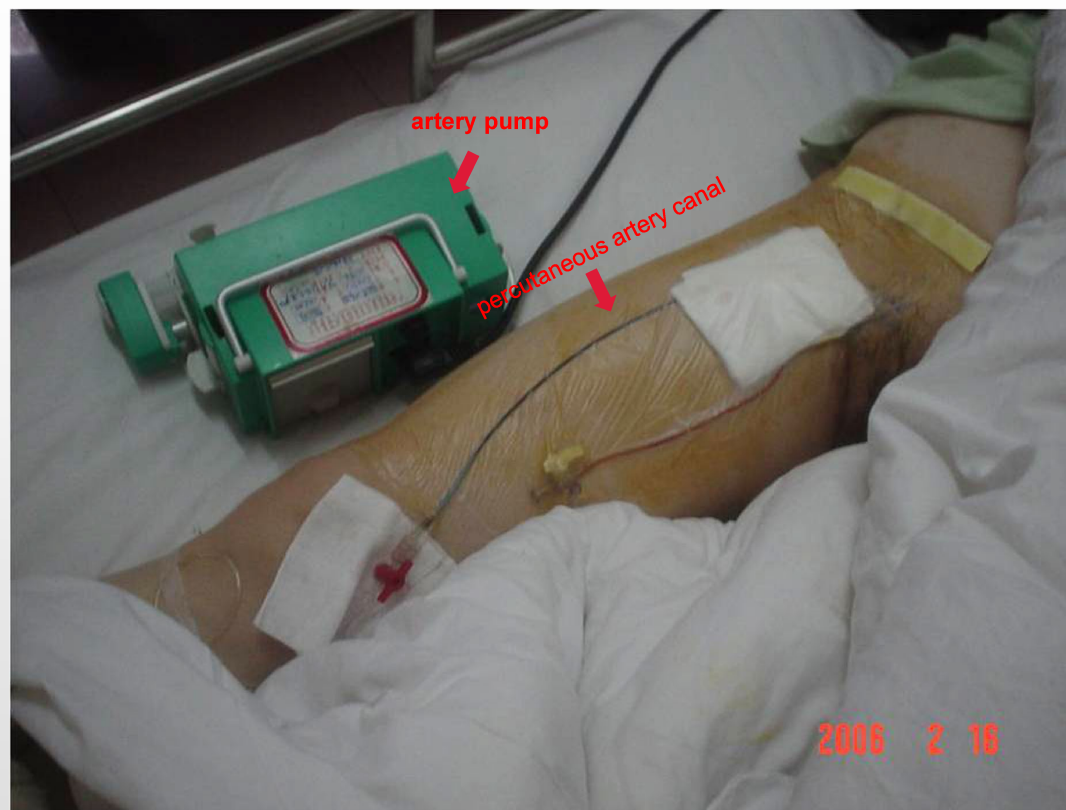

**Supplementary Figure 1: The picture for continuous intra-femoral urokinase injection approach**

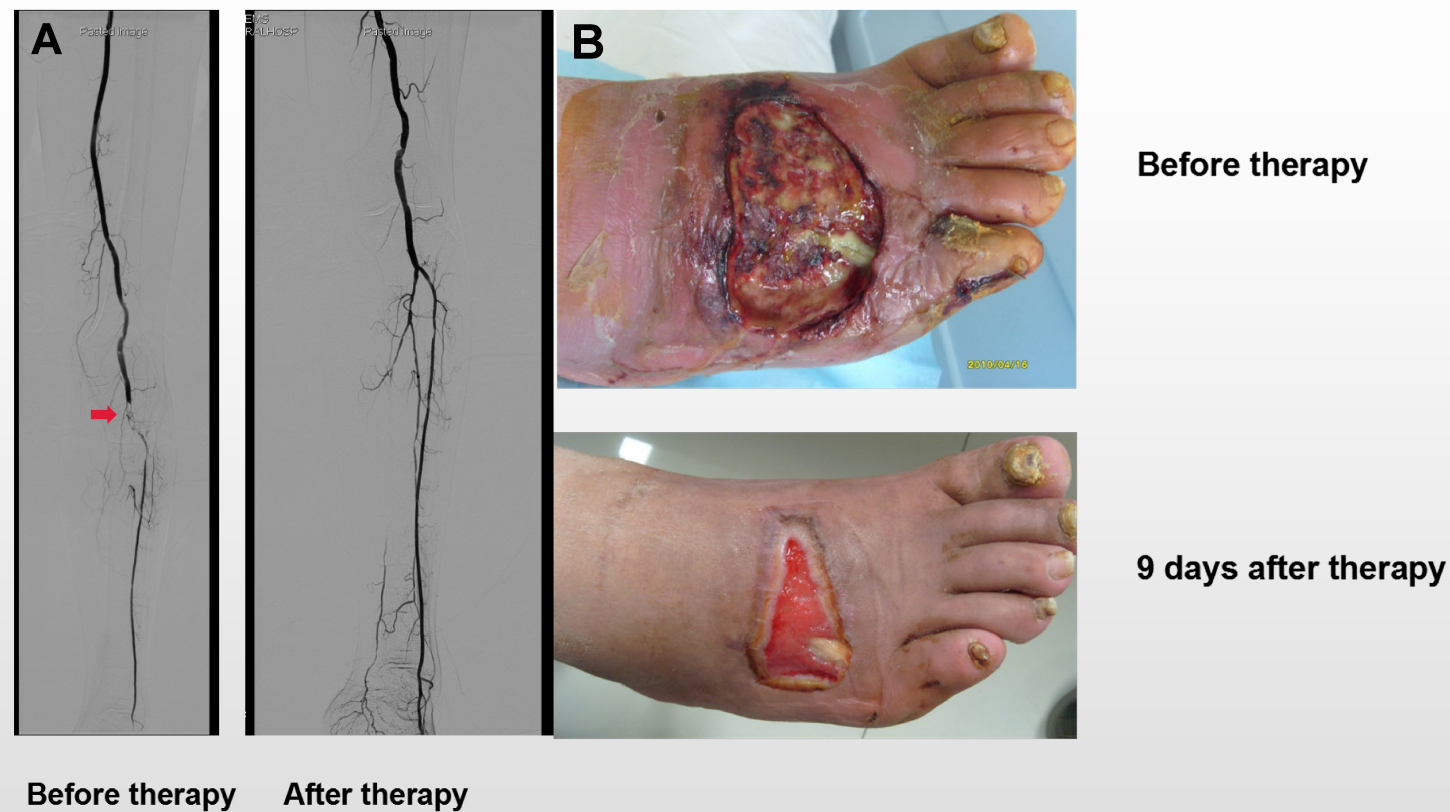

## Supplementary Figure 2: The representative images for lower artery angiography and ulcer healing conditions

(A) The representative images for lower artery angiography before and after intra-femoral thrombolysis therapy (just conducted in 2 patients before and after thrombolysis). Solid arrow indicates the occlusion of the distal popliteal artery. (B) The representative ulcer healing conditions before and 9 days after intra-femoral thrombolysis therapy

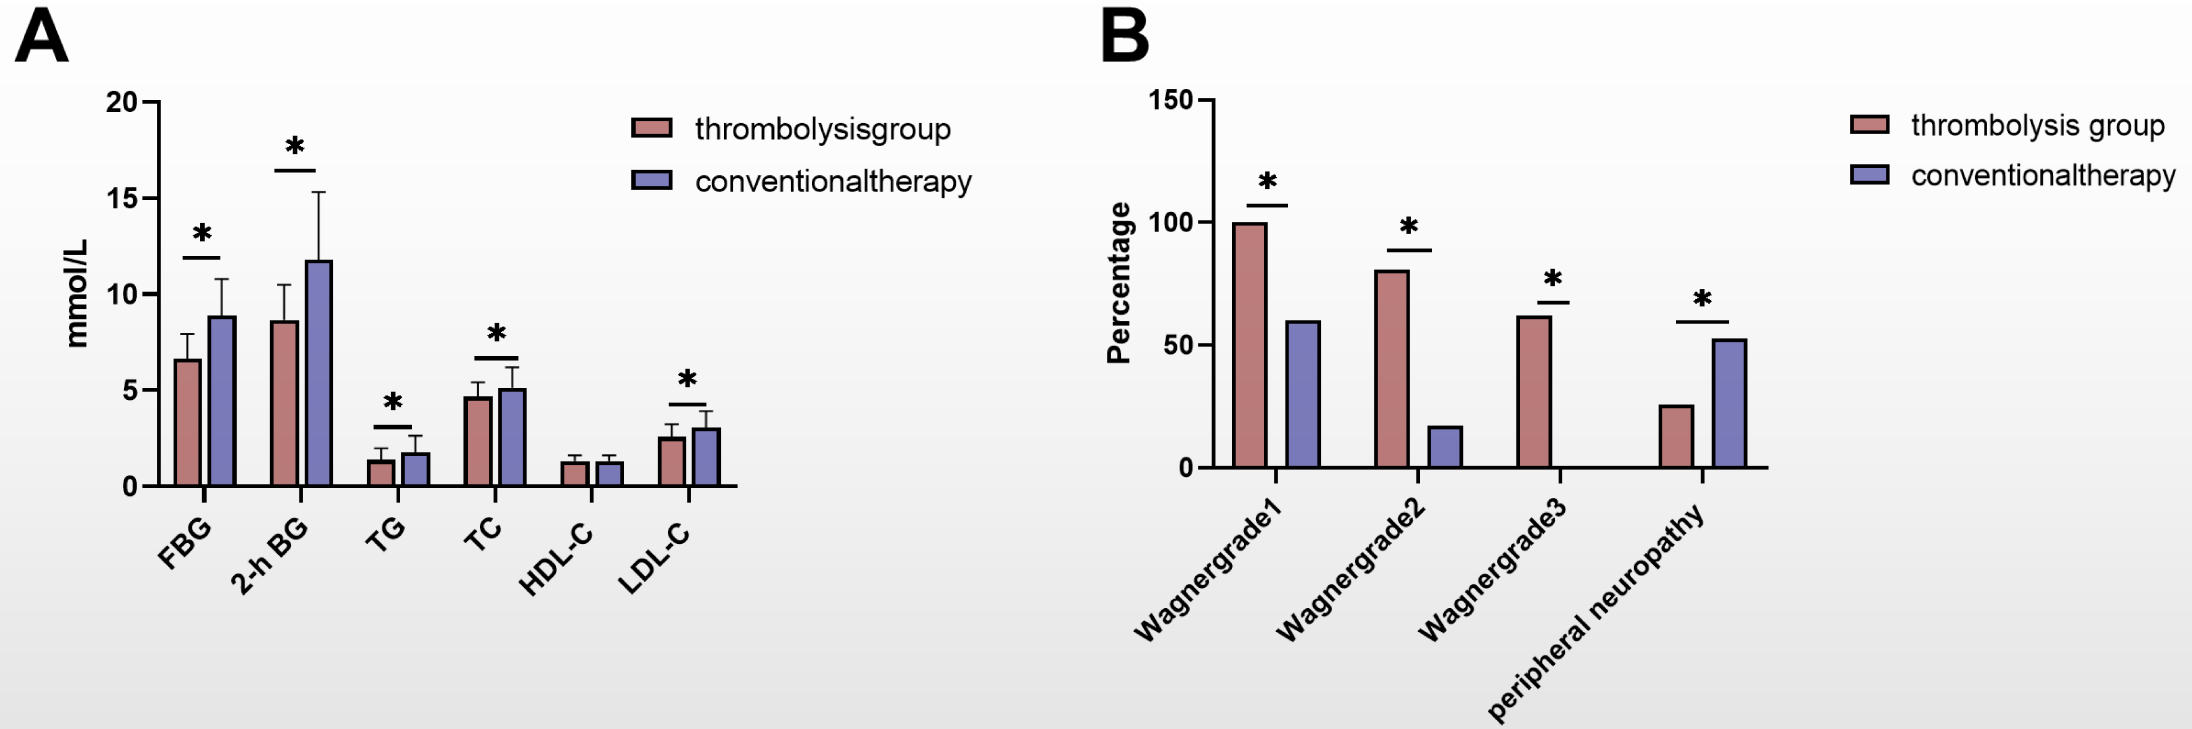

**Supplementary Figure 3. The glycolipid metabolic profiles at the first month after interventions**

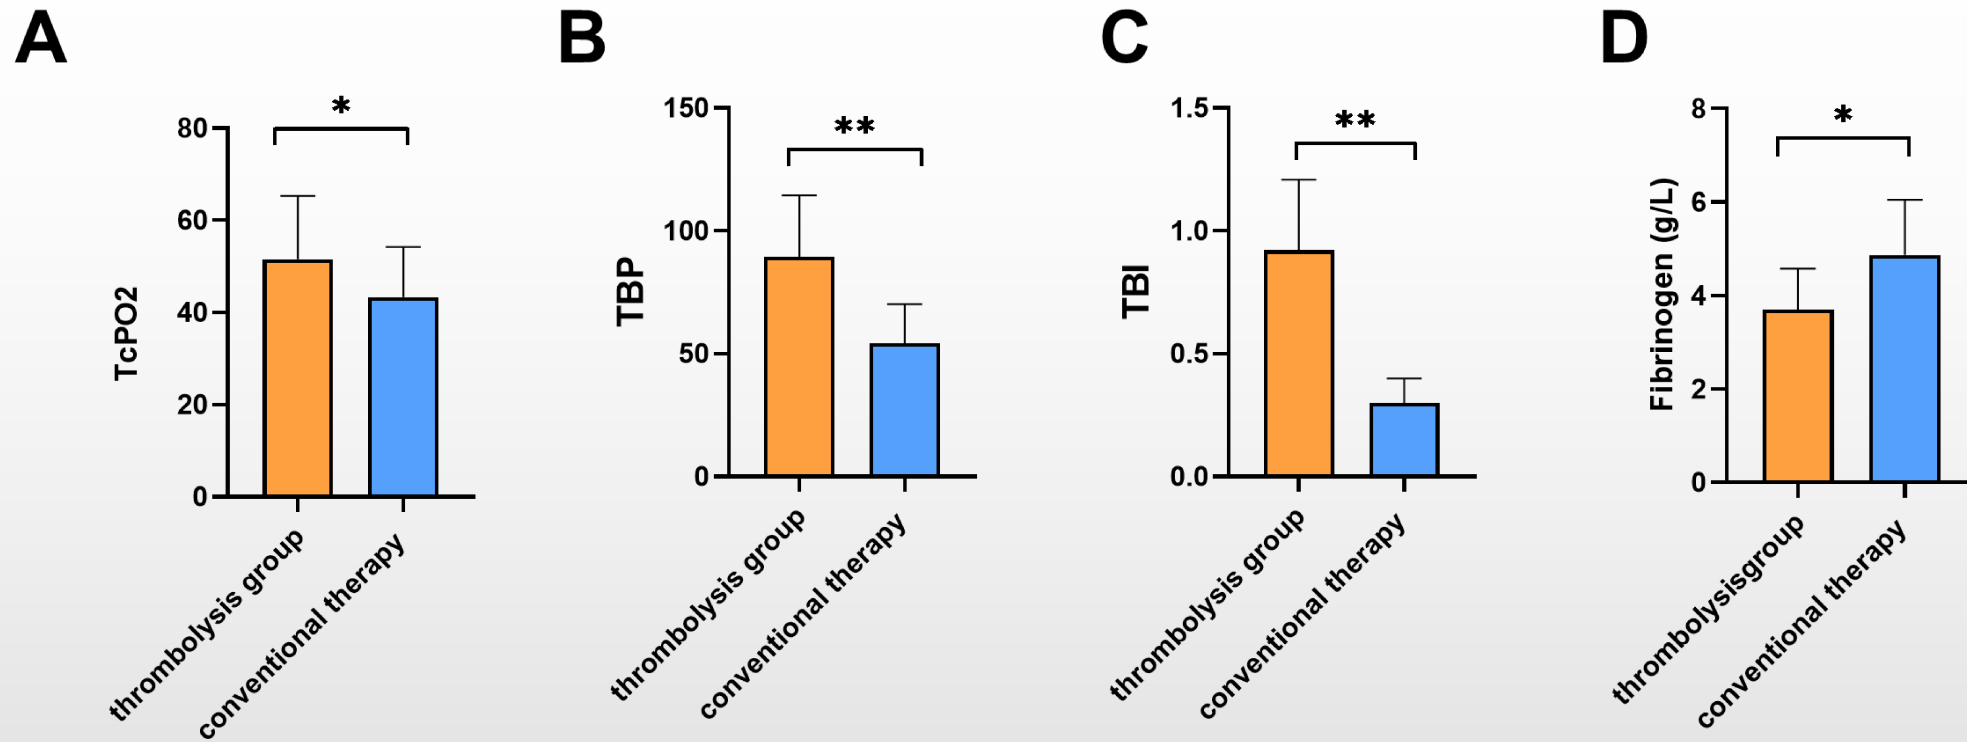

**Supplementary Figure 4. The foot ulcers healing, blood supply at the first month after interventions**

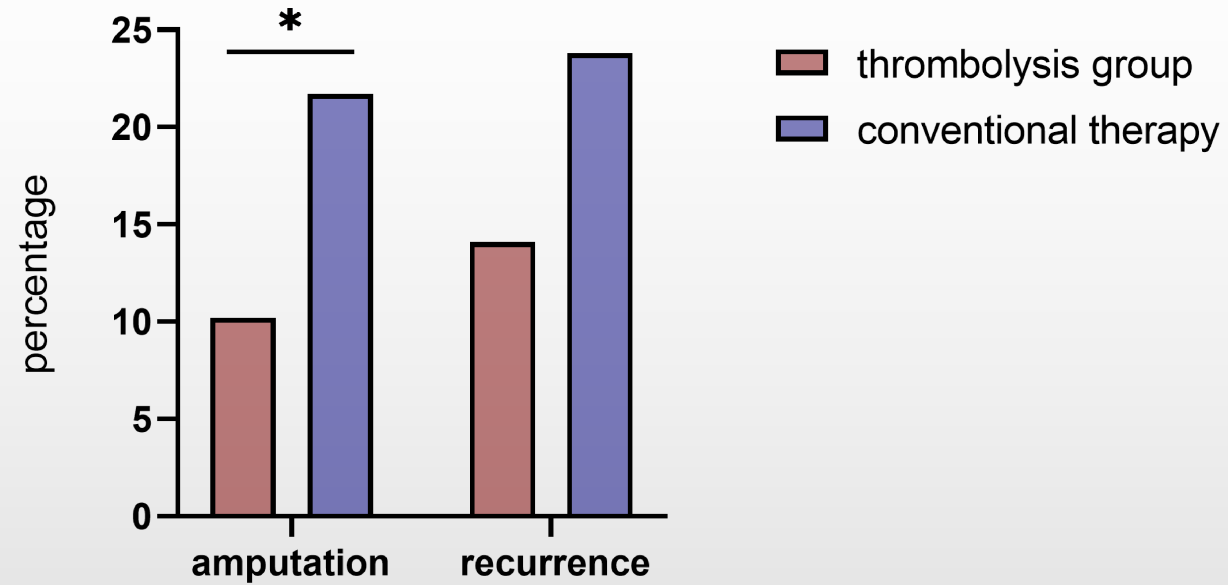

**Supplementary Figure 5. The incidence of amputation and recurrence during the long term follow-up study**

## Supplementary Table 1—Cox regression analysis of demographic and clinical variables associated with ulcer closure

|                             | Univariate analysis   |         | Multivariate analysis |         |
|-----------------------------|-----------------------|---------|-----------------------|---------|
|                             | Hazard ratio (95% CI) | P value | Hazard ratio (95% CI) | P value |
| Treatments                  | 0.38 (0.26-0.57)      | <0.001  | 0.003 (0.001-0.011)   | <0.001  |
| Age (y)                     | 0.29 (0.16-0.54)      | <0.001  | 0.236 (0.10-0.55)     | 0.001   |
| Diabetes duration (y)       | 0.30 (0.14-0.65)      | 0.002   | 0.004 (0.001-0.016)   | <0.001  |
| HbA1c level                 | 0.43 (0.28-0.66)      | <0.001  | 0.21 (0.073-0.61)     | 0.004   |
| Ulcer size, cm <sup>2</sup> | 0.46 (0.29-0.71)      | <0.001  | 0.094 (0.026-0.34)    | <0.001  |
| Ulcer duration, mo          | 0.96 (0.66-1.38)      | 0.807   | 0.56 (0.35-0.88)      | 0.012   |

## Supplementary Table 2—Summary of Adverse Events

|                      | <b>thrombolysis therapy(n=98)</b> | <b>conventional therapy(n=97)</b> |
|----------------------|-----------------------------------|-----------------------------------|
| Peripheral Swelling  | 0(0.0% )                          | 1( 1.0%)                          |
| Pyrexia              | 0(0.0% )                          | 0(0.0% )                          |
| Wound infection      | 0(0.0% )                          | 3( 3.0%)                          |
| Decubitus ulcer      | 0(0.0% )                          | 0(0.0% )                          |
| Pruritus             | 0(0.0% )                          | 0( 0.0%)                          |
| Hemorrhagic stroke   | 0(0.0% )                          | 0(0.0% )                          |
| Pulmonary infarction | 0(0.0% )                          | 0( 0.0%)                          |
| Allergic reaction    | 0(0.0% )                          | 0(0.0% )                          |
| Oozing blood         | 2(2.0% )                          | 1(1.0% )                          |
| Catheter defluxion   | 0(0.0% )                          | 0(0.0% )                          |

**Supplementary Table 3—Incidence of cardiovascular events during follow-up study**

| <b>Events</b>                          | <b>thrombolysis therapy(n=98)</b> | <b>conventional therapy(n=97)</b> |
|----------------------------------------|-----------------------------------|-----------------------------------|
| Cardiovascular events                  | 47 (48.0%)                        | 58 (59.8%)                        |
| cardiovascular death                   | 9 (9.2%)                          | 18 (18.6%)                        |
| coronary heart disease events          | 23 (23.5%)                        | 25 (25.8%)                        |
| total stroke                           | 15 (15.3%)                        | 15 (15.5%)                        |
| coronary and carotid revascularization | 0                                 | 0                                 |
| Total mortality                        | 21 (21.4%)                        | 31 (32.0%)                        |

Only first event for each patient counted in each row. Data are number (%).



### Supplementary Table 4—The mean health related quality of life scores from DFS-SF subscales questionnaire

|                                    | thrombolysis therapy(n=20) | conventional therapy(n=20) |
|------------------------------------|----------------------------|----------------------------|
| DFS-SF scale : mean (SD)           |                            |                            |
| Leisure                            | 40.5 ( 14.5 )              | 37.5 ( 17.2 )              |
| Physical health                    | 65.3 ( 20.2 )              | 53.3 ( 13.2 )              |
| Dependence or daily life           | 57.5 ( 22.4 )              | 52.0 ( 19.8 )              |
| Negative emotions                  | 50.3 ( 13.7 )              | 42.4 ( 18.3 )              |
| Being worried about ulcers or feet | 43.0 ( 17.3 )              | 37.7 ( 16.2 )              |
| Being bothered by ulcer care       | 58.7 ( 15.0 )              | 45.2 ( 19.3 )              |
